# Supplementary material
Source: bioRxiv or medRxiv preprint supplement (http://medrxiv.stage.highwire.org/highwire/filestream/84958/field_highwire_adjunct_files/2/2020.06.03.20118570-3.pdf)
Supplement: Supplementary file [file 2020.06.03.20118570-3.pdf]

**GO:0098655**  
**(cation transmembrane transport)**

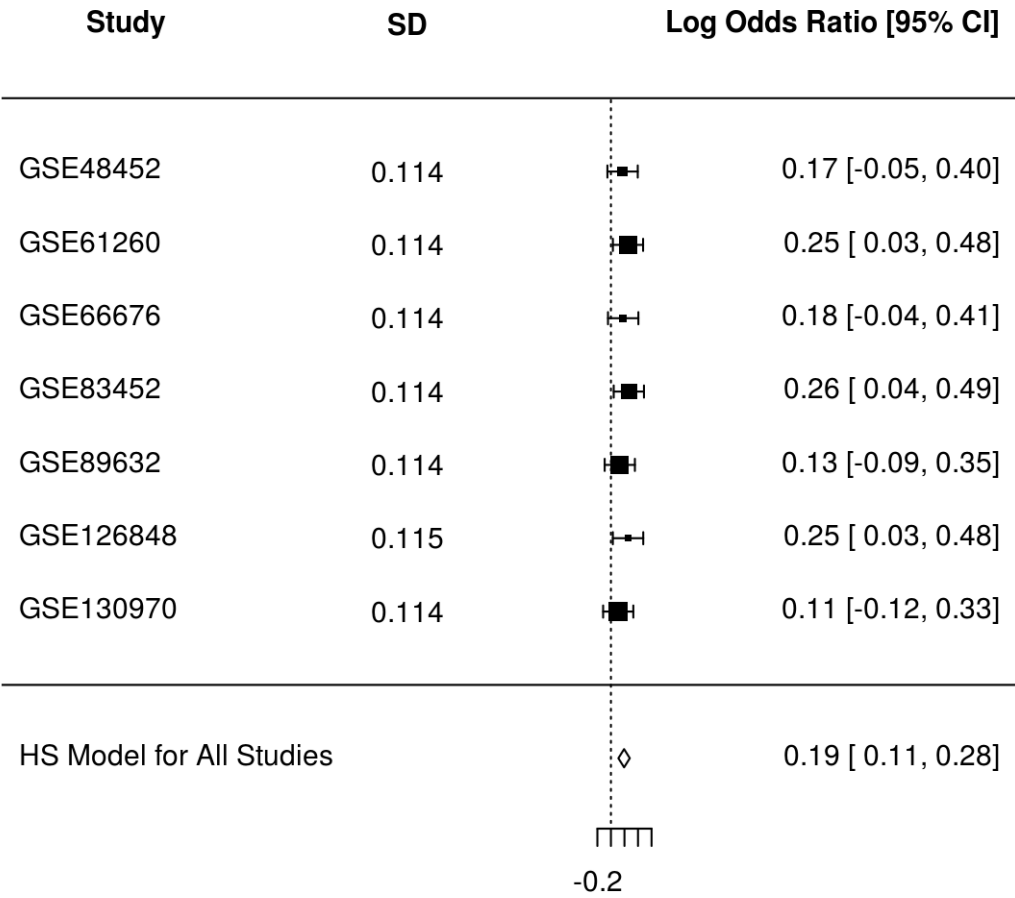

**GO:0098662**  
**(inorganic cation transmembrane transport)**

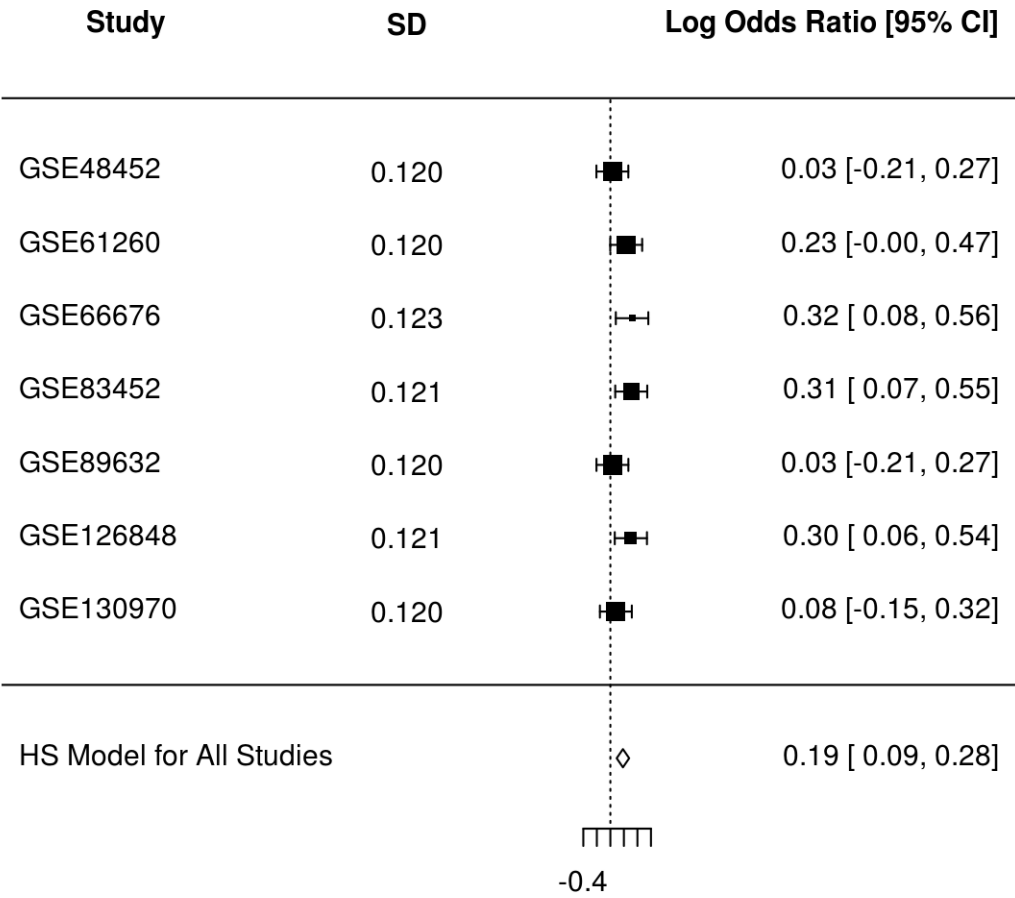

**GO:0030001**  
**(metal ion transport)**

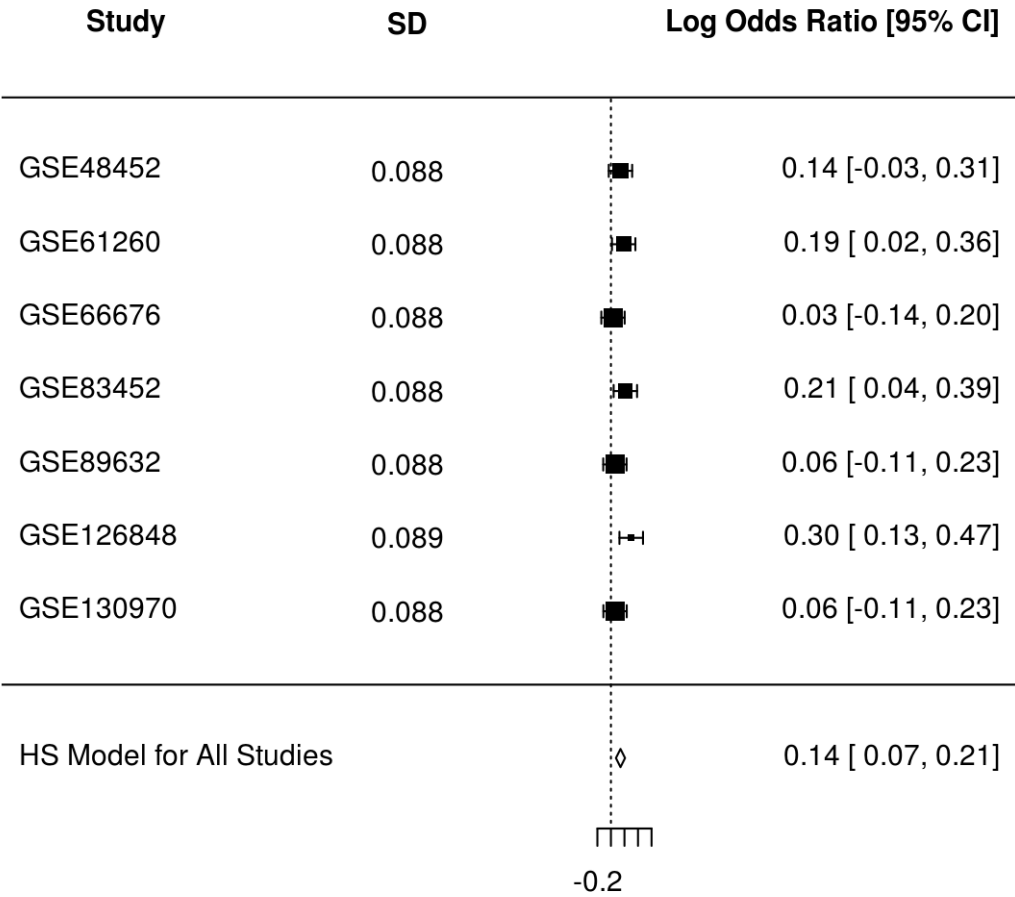

**GO:1904062**  
**(regulation of cation transmembrane transport)**

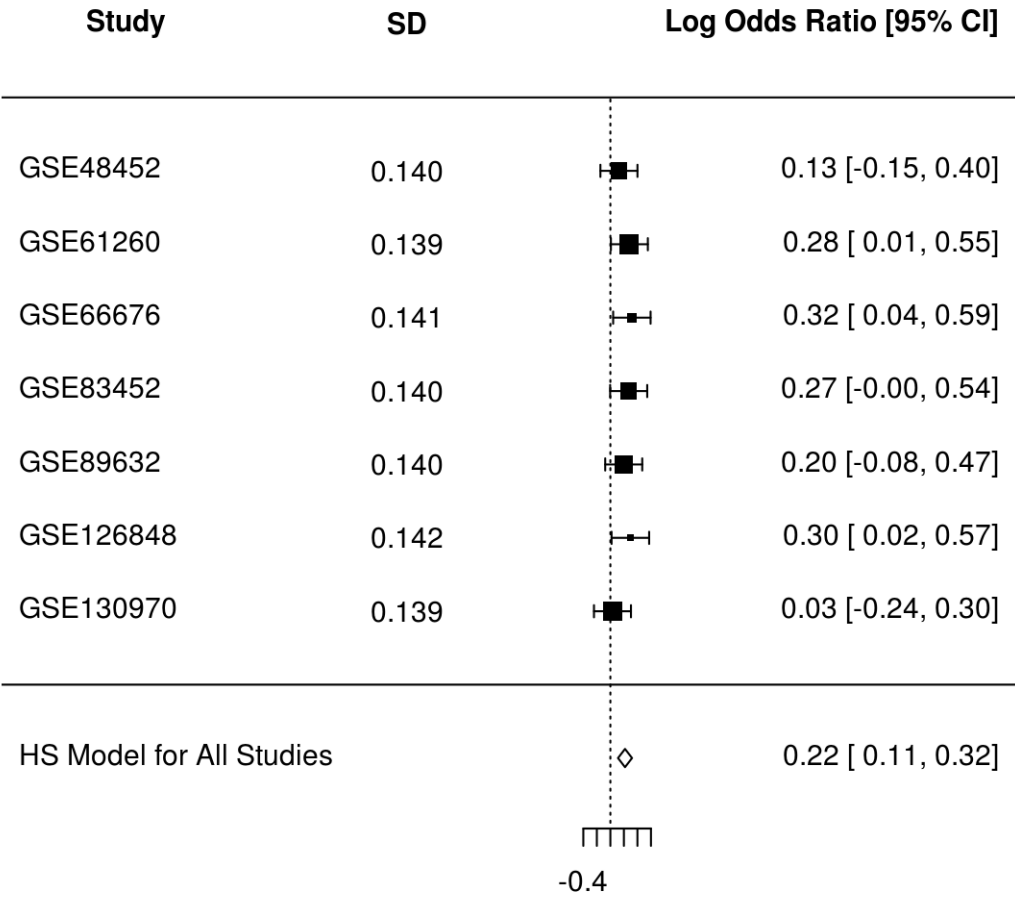

**Supplementary Figure 3. Forest plots of significant GO terms from our functional pathways meta-analysis.**
